# Supplementary material for: Clinicopathological Characteristics of Plurihormonal Pituitary Adenoma
Source: Front Surg. 2022 Feb 25;9:826720. doi: 10.3389/fsurg.2022.826720 (PMC8913533; doi:10.3389/fsurg.2022.826720)
Supplement: Supplementary file 1 [file Table_1.XLSX]

## Sheet: 2008-2010数据
住院号	性别	年龄	主诉	入院时间	住院时间（d）	病程	MRI号	病理号	临床诊断	病理诊断	组化	ki-67	术式	术中情况							术后并发症			术前激素						术后激素						备注
														肿瘤大小（cm）	肿瘤质地	血供	边界	侵袭性	卒中情况	CSF	CSF	尿崩	其他	PRL	GH	ACTH	TSH	T3	T4	PRL	GH	ACTH	TSH	T3	T4
548934	女	38	视野缺损	2008.9.22	45	13年	1054914	08-30180	垂体瘤术后复发	TSH/PRL	TSH/PRL	未测	经蝶	1*0.8*0.7	韧	一般	不清	右侧海绵窦及包绕同侧海绵窦	N	N	N	N	N	正常	0.257	32.4	2.0183	2.42	0.73	3.92			0.4779	1.93	1.11	1995年9月29日在我院行开颅手术，95年111月我院放疗，2007年5月22日经蝶手术
852487	女	55	头痛，视力下降	2008.7.28	18	6年	02，04，08门诊	08-21283	垂体瘤术后复发	ACTH ,PRL腺瘤	ACTH，PRL	未测	经蝶	未诉	稀软	一般	未诉	未诉	N	N	N	Y	N	9.44	<0.05	32.4	0.6847	2.26	0.99	10.8	0.166		0.3896	1.79	1.16	02年开颅手术，04年经蝶手术，病理号04-11380，嫌色细胞瘤（均阴），
950150	男	46	头痛，视力下降	2008.3.17	25	3年	096175，068042，063693	08-07837	复发垂体巨腺瘤	FSH，PRL腺瘤侵及硬膜	PRL，FSH	未测	经蝶	3*3*2.5	韧	丰富	不清	海绵窦，鞍上	N	N	N	N	N	26.27			3.567	2.01	0.61	6.95			0.7967	1.58	0.52	05年12月因视力下降行口鼻蝶手术，06年5月我院行开颅手术，病检06-10233，示LH腺瘤，术后06年8月MRI示4.5*2.5残留，术前FSH 40.46升高，半年后行开颅手术，病理08-24620，GH，LH，FSH腺瘤，术后额颞部血肿。
971533	女	63	视力下降	2008.3.7	17	2年	缺	08-05265	垂体瘤复发，侵袭性垂体腺瘤	PRL，ACTH腺瘤侵及硬膜	ACTH，PRL	未测	经蝶	2*2.5	软	一般	不清	海绵窦	N	N	N	Y	N	59.67	0.428	34.2	2.44	1.26	0.29	16.98						06年9月因视力下降在我院行口鼻蝶手术，术后病检示促肾上腺皮质激素腺瘤，06-23341
1043649	男	22	头痛	2008.1.25	11	2年	缺	08-1469	侵袭性PRL腺瘤	多激素腺瘤侵及鞍底硬膜	PRL，ACTH	未测	经蝶	5*5*5.5	韧	一般	不清	蝶窦，海绵窦，左侧颞窝，鞍上	N	N	N	N	N	20862.7	0.494	17.7	0.9296	2.58	0.82	3799.2	0.338					术后口服溴隐停2片，BID
1044286	男	61	视力下降	2008.1.19	12	2年	1044286，93373	08-2001	垂体瘤	多激素腺瘤侵及鞍底硬膜	ACTH，PRL	未测	经蝶	1.5*1.8*1.6	软至韧	一般	清	未诉	未诉	N	N	N	N	11.17	0.072	13.3	2.9104	1.8	1.03							术后激素未测
1047548	女	44	视力下降	2008.2.19	16	半年	094921	08-3799	侵袭性垂体腺瘤	多激素腺瘤侵及鞍底硬膜	PRL，LH，GH	未测	经蝶	1.8*2.7	软	一般	不清	海绵窦，鞍上	N	N	N	N	N	68.67	1.42	13.2	Normal	Normal	Normal	38.78	0.185	12.1
1048802	女	53	视力下降	2008.2.26	13	3年	94387	08-3940/08-27022	垂体瘤经蝶术后	多激素腺瘤	PRL，GH，FSH，LH	未测	经蝶	4*2*2.5	软至韧	丰富	不清	海绵窦	N	N	N	N	N	20.5	<0.05	75.4	0.7785	2.03	0.76	5.99			0.0909	1.1	0.74	术后一周甲功TSH 0.1312，T3 1.72,T4 1.29, 08年2月行经蝶手术，术后半年肿瘤复发。
1050377	男	59	视物模糊	2008.3.7	15	1月	095704	08-5505	垂体瘤	LH，PRL腺瘤侵及硬膜	LH，PRL	未测	经蝶	未诉	软	一般	不清	海绵窦，蝶窦，鞍上	N	N	N	N	N	28.3	0.252	31.9	5.02	2.26	0.73	10	0.437	<10	0.1455	1	0.46
1050546	女	46	头痛/肢端肥大	2008.3.7	18	6年/2年	缺	08-5266	肢端肥大症，垂体微腺瘤	GH，PRL，TSH腺瘤	GH，PRL小灶性，TSH小灶性	未测	经蝶	1*1	软	一般	不清	海绵窦	N	N	N	N	N	58	16.1	45.2				20.8	2.32		0.88	1.74	0.96
1050991	男	45	肢端肥大	2008.3.11	13	4年	门诊	08-05753	肢端肥大症，垂体瘤	GH，PRL，ACTH腺瘤	GH，PRL，ACTH灶性	未测	经蝶	1*1	软至韧	未诉	不清	未诉	N	N	N	N	N	15	17	30.9	1.2872	2.59	0.98	2.09	0.515		0.8905	1.25	0.91
1052302	女	24	产后视物模糊	2008.3.19	24	不详	缺	08-06887	垂体巨腺瘤伴卒中	多激素腺瘤	PRL，TSH	未测	经蝶	未诉	坚韧	未诉	不清	未诉	Y	N	Y	N	甲减	18.7	0.578	<10	1.79	2.85	0.45	0.63	<0.05	<10	0.2513	1	<0.4	少许清亮液体由鼻腔流出，保守治疗愈合可，术前患者皮质功能低下，皮质醇 0.1（L ),术后两周TSH，T3，T4低下，皮质醇低，PRL 0.39,予以口服甲状腺素
1053172	男	57	视力下降	2008.4.1	15	4年	缺	08-08021	垂体瘤	ACTH ,PRL腺瘤侵及硬膜	ACTH，PRL	未测	经蝶	2*2.5*3.5	软	未诉	未诉	未诉	N	N	N	N	N	14.2	0.126	14.4	2.2	2.18	0.78				0.194	1.36	0.7
1053914	男	54	视力下降	2008.3.26	13	3月	缺	08-07517	垂体腺瘤	PRL，LH腺瘤侵及硬膜	PRL，LH	未测	经蝶	3*2.5*3	软至韧	丰富	不清	海绵窦	N	N	N	N	N	23.5	0.062	53.3	4.9682	1.7	0.59				1.5355	1.39	0.66
1060670	女	36	闭经泌乳	2008.5.11	15	5年	097801/098647	08-12633	垂体瘤	ACTH，PRL腺瘤侵及硬膜	ACTH，PRL	未测	经蝶	2.4*2.7*1.5	软	一般	不清	右侧海绵窦	N	N	N	N	N	69.5	0.142	81.5	1.7154	2.01	0.72	6.52	0.231	17.3	0.16668	1.42	0.82
1067287	男	70	视力下降	2008.6.13	18	1月	缺	08-16575	垂体瘤	LH，PRL腺瘤侵及硬膜	LH，PRL	未测	经蝶	2.5*1.5*1.5	软至韧	一般	清	未诉	N	N	N	N	甲减	29	<0.05	37.4	1.8634	2.15	0.64	30.3			0.1277	1.31	0.65
1068354	男	51	体检发现	2008.6.18	19	4天	13742	08-17389	垂体大腺瘤	PRL，LH腺瘤侵及硬膜	PRL，LH	未测	经蝶	2	软	丰富	不清	右海绵窦	N	N	N	N	N	17.5	0.08	35	2.27	2.27	0.96	8.27			2.1281	1.16	0.68
1071645	女	51	视力下降	2008.7.9	14	2年	缺	08-19268	侵袭性垂体腺瘤伴卒中	PRL，ACTH腺瘤侵及硬膜	PRL，ACTH灶性	未测	经蝶	3.5*2.5*2.5	软	一般	不清	蝶窦，鞍内，鞍上	N	N	N	N	甲减	58.8	<0.05	16.8	1.7884	2.02	<0.4	35.3			1.0435	1.04	0.48	术后口服溴隐停
1078251	女	32	泌乳	2008.9.8	10	6月	缺	08-25122	垂体微腺瘤伴囊变	多激素腺瘤	GH，PRL，ACTH、	未测	经蝶	1	稀软	未诉	未诉	未诉	N	N	N	N	N	63.9	0.191	37.7	0.3569	1.76	0.86	27.9			0.7811	2.58	1.26
1080475	女	23	闭经	2008.9.3	27	4月	105325	08-25548	垂体微腺瘤药物治疗后	多激素腺瘤	PRL，GH，ACTH灶性	未测	经蝶	0.6*0.7	软	未诉	未诉	未诉	Y	N	N	N	N	137.5	1.47	13.6	0.0054	3.92	1.39	18.1			0.0013	1.23	0.9
1082009	女	25	高血压，左肾上腺瘤	2008.11.17	32	4/2年	0109702	08-34941	Cushing综合征，垂体微腺瘤	多激素腺瘤	ACTH，PRL，GH	未测	经蝶	0.8*0.8*0.5	稀软	丰富	未诉	未诉	N	N	N	N	N	11.4	0.337	19.5	1.4157	2.6	1	13.8		<10	1.1387	1.79	1.16	24小时尿游离皮质醇269.82升高，术后患者血压降至正常。
1082512	男	50	头痛	2008.11.18	17	1月	109454	08-33670	侵袭性垂体瘤	PRL，TSH腺瘤侵及硬膜	PRL，TSH	未测	经蝶	1.3*1.2*0.8	软	丰富	不清	右海绵窦	N	N	N	N	N	10.5	0.88	35.6	3.0288	4.63	1.53	4	0.232	24.6	0.0718	2.24	1.17
1085532	男	43	肢端肥大	2008.9.11	14	8年	105457	08-25544	垂体瘤	多激素腺瘤侵及鞍底硬膜	GH，TSH	未测	经蝶	1.2*1*1	软	一般	未诉	无	N	N	N	N	N	10.95	16.1	76.2				8.9	1.08		0.2353	1.16	0.96	糖尿病，术前IGF-1 773
1091129	女	40	闭经泌乳	2008.10.13	21	2年	0106903	08-29872	垂体微腺瘤药物治疗后	多激素腺瘤	PRL，ACTH部分，LH部分，GH部分	未测	经蝶	0.4*0.3*0.3	韧	一般	粘连	海绵窦	N	Y	N	N	N	326	0.063	43.7	2.6177	2.25	1.01	86.99			0.1643	1.72	0.95	术后口服溴隐停
1099683	男	64	发现鞍区占位	2008.12.4	22	10年	021013	08-34931	垂体腺瘤伴卒中	多激素细胞腺瘤侵及硬膜	LH部分，FSH部分	未测	经蝶	3.1*2.6*2.2	稀软	丰富	未诉	无	Y	N	N	N	N		0.217	<10	0.2941	1.17	0.76	0.87		10.2	0.2337	1.08	1.01		垂体功能减退
840357	女	60	视力下降	2009.5.10	17	10年	无	09-13693	垂体瘤复发	多激素细胞腺瘤	ACTH，GH，PRL	未测	开颅	4	软至韧	丰富	不清	视神经，大脑前A	N	N	N	N	N		<0.05	21	2.5	1.79	0.53		0.053	18.2	0.73	1.27	0.45	04年患者因视力下降在我院行口鼻蝶手术
852956	男	44	视力下降	2009.7.12	23	5年	我院门诊	09-21232	垂体瘤复发	FSH，PRL腺瘤	FSH，PRL	<5%	经蝶	2	软	一般	不清	未诉	N	N	N	Y	电解质紊乱		<0.05	47	2.56	2.56	0.71	6.2			0.61	1.89	1.02	04年患者因视力下降在我院行开颅手术
979511	女	20	肥胖，停经	2009.2.10	22	2年	114557/113917/112055	09-4352	库欣综合征，垂体瘤切除术后	垂体多激素腺瘤	PRL，LH，GH，TSH	未测	经蝶	未诉	软	一般	不清	未诉	未诉	N	N	N	N		0.268	48.6	13.65	1.35	0.57		0.198	62.3				为探查术，06年探查提示垂体增生
1100600	女	24	月经不规则	2009.1.6	14	6年	111986	09-00983	垂体腺瘤	多激素细胞腺瘤	ACTH，GH，PRL	未测	经蝶	1.5*1*1	软	丰富	不清	左侧海绵窦	N	N	N	N	N	30.4	10.1	22.8	0.4052	3.85	1.16	3.79	1.18		0.5477	1.47	0.91
1105337	男	38	视力下降	2009.4.21	28	3月	80001106	09-11501	垂体瘤卒中	多激素腺瘤	FSH，LH,GH，PRL	未测	经蝶	3*2.5*2.5	软至韧	一般	不清	鞍上	Y	N	N	Y	电解质紊乱，鼻腔出血	22.7	0.454	45.4	1.25	2.47	0.73	12.79	0.441	19.1	0.3881	1.39	0.79	术后口服弥凝片控制尿量
1107418	女	33	月经不调，泌乳	2009.2.17	28	10年	113552	09-04806	垂体微腺瘤	ACTH和GH腺瘤	GH，ACTH	未测	经蝶	1.5*1.5*1	软至韧	丰富	清	未诉	N	Y	N	N	低钠	119.9	0.285	45	2.06	2.66	0.81		0.921	23.3	0.4357	1.89	0.92
1107820	男	15	视力下降	2009.2.19	26	1周	114670	09-05263	垂体瘤伴卒中	多激素腺瘤	GH，PRL，ACTH，LH	未测	经蝶	2*1.5*1	韧	一般	不清	鞍上	Y	N	N	N	N	42.2	1.09	20.4	Normal	Normal	Normal	3.9	4.07	19	0.1223	1.95	0.77
1108518	男	15	肥胖	2009.2.24	39	3月	115111	09-06366	库欣综合征，垂体瘤卒中	多激素腺瘤	PRL，GH，ACTH	未测	经蝶	1.2*1.2*1	软至韧	一般	未诉	未诉	Y	N	N	N	发热		2.43	H	Normal	L	Normal		0.127	14.8	Normal	Normal	Normal	大剂量地塞米松抑制试验阳性，术后十天GH 0.111，ACTH32.2，脑脊液培养阴性
1113100	女	56	头痛视物模糊	2009.3.18	26	5月	0116775	09-8524	库欣病，垂体瘤	GH，ACTH腺瘤	ACTH，GH	未测的	经蝶	0.8*0.5*0.5	软至韧	一般	清	未诉	Y	N	N	N	N	Normal	0.144	90	0.6156	1.56	0.72	Normal	<0.05	<10	0.213	1.36	0.76	内分泌ACTH 18.97（升高），皮质醇 304.8（升高），24小时尿游离皮质醇 511（升高），患者高血压，糖尿病
1113685	女	59	头痛	2009.3.22	25	1周	0116907	09-08138	垂体瘤并卒中	多激素腺瘤侵及硬膜	PRL，LH，GH	未测	经蝶	1.5*1.5*2	软至韧	一般	清	未诉	Y	N	N	N	鼻腔出血	30	0.738	56	0.5241	2.43	0.99							术后激素未查
1116016	男	41	视力下降伴视野缺损	2009.4.6	11	1年半	无	09-09449	鞍区巨大占位，侵袭性垂体瘤	LH，GH，PRL腺瘤侵及硬膜和黏膜	LH，GH，PRL	未做	经蝶	５×４×４	软至韧	丰富	不清	蝶窦，双侧海绵窦，鞍上	N	N	N	N	尿多		0.121	54.6	0.6557	1.93	0.54		0.735	<10	0.048	1.08	0.54	术后口服弥凝片和优甲乐
1117537	女	42	停经，视力下降	2009.4.14	18	3年	80001415	09-11179	垂体瘤卒中	FSH，GH，PRL腺瘤侵及硬膜	FSH，GH，PRL	<5%	经蝶	3*3*3.5	软至韧	未诉	清	未诉	Y	N	N	N	鼻腔出血	40	0.37	21.7	2.82	2.04	0.65	14	0.068	21.3	2.68	1.35	0.67	鼻腔渗血，耳鼻喉拔出砂条
1126148	男	53	肢端肥大	2009.6.11	20	8年	80005986	09-17559	肢端肥大症，垂体瘤	多激素细胞腺瘤	PRL，LH,GH	未测	经蝶	1.8*1.1	软至韧	一般	清	未诉	N	N	N	N	N		34.3	Normal	Normal	Normal	Normal		1.02	<10	Normal	Normal	Normal	术前IGF-1 612，
1126167	女	37	进行性肥胖	2009.6.12	21	2年	缺	09-17558	Cushing综合征，垂体瘤	多激素腺瘤侵及硬膜	ACTH，PRL，GH	未测	经蝶	1.5	软至韧	一般	清	未诉	Y	N	N	N	带状疱疹	8.54		23.79H	L	Normal	Normal		0.05	13.3	L	Normal	L
1128960	女	20	发热	2009.6.29	24	1月	80007786	09-20354	垂体肿瘤？垂体脓肿？	垂体多激素腺瘤	ACTH，PRL，GH	未测	经蝶	1.5*1*0.5	韧	丰富	未诉	未诉	N	N	N	N	N	18	0.673	Normal	Normal	L	L		0.065	<10				二月后患者全垂体功能减退，（皮质醇，睾酮，雌二醇，PRL1.52，甲状腺功能均低下），予以强的松，优甲乐，弥凝片口服。80021601
1129098	女	33	月经不调	2009.6.29	16	半月	80004138	09-19385	垂体微腺瘤	多激素腺瘤	ACTH，PRL，GH	未测	经蝶	0.8*0.5*0.8	中等	一般	清	未诉	Y	N	N	N	鼻腔渗血	80.8	0.091	17.6	1.7	2.26	0.69	5.49	0.285	13.1	1.036	1.69	0.87
1132438	女	38	月经不调	2009.7.20	15	2月	门诊	09-21823	垂体瘤	ACTH，PRL瘤侵及硬膜	ACTH，PRL	未测	经蝶	未诉	未诉	未诉	未诉	未诉	N	N	N	N	N	104.9	0.358	35.7	2.096	1.34	0.45	41.66	<0.05	<10	2.93	1.68	0.78
1146951	女	64	视力下降	09.10.18	17	3年	80015723	09-31424	肢端肥大症，垂体瘤	PRL，TSH侵及硬膜	PRL，TSH，GH灶性	0.01	经蝶	1.4*0.8	软	一般	清	未诉	N	N	N	N	N	15.9	4.76	46.3	1.6815	3.09	1.11	6.84	0.116	10.3	2.49	1.85	1.13
1147107	男	39	头痛，肢端肥大	09.10.19	14	3年	80015637,80015731	09-31419	肢端肥大症，垂体瘤	多激素腺瘤	PRL，LH，TSH	未测	经蝶	1.5*1.2	软	一般	未诉	未诉	N	N	N	N	N		9.8	36.3	1.5459	2.95	0.96		1.06	32.8	0.66	1.04	0.84
1148756	男	35	肢端肥大，头痛	09.10.26	16	1年	缺	09-31891	肢端肥大症，垂体瘤	多激素腺瘤	ACTH，PRL，GH	未测	经蝶	1.5*1*1	软	丰富	不清	海绵窦	N	N	N	N	N	12	24.3	63.7	4.97	3.36	1.14	8.7	1.19	12.3	2.13	1.83	1.11
1149186	男	51	消瘦	09.10.28	20	3月	80016469	09-32577	垂体瘤	多激素腺瘤	PRL，TSH	未测	经蝶	未诉	脆软	一般	不清	无	N	Y	N	N	N	Normal	<0.05	27.6	3.096	3.09	1.59	Normal			0.038	2.3	1.58
1150266	男	52	多饮多尿	2009.11.14	20	1月	80017091	09-34179	垂体脓肿？	多激素腺瘤	ACTH，GH，PRL	未测	经蝶	0.7*1	韧	未诉	未诉	未诉	N	N	N	N	N			L	L	Normal	Normal		<0.05	<10	0.002	2.39	1.44	囊性占位，内容物为淡黄至深黄粘稠脓性液体
1153571	女	33	月经不调泌乳	09.11.25	13	4年	我院MRI09.6.18，09.11.11	09-35324	垂体微腺瘤药物治疗后	多激素细胞腺瘤	LH，PRL，GH	未测	经蝶	未诉	韧	一般	清	无	N	N	N	N	甲减	29.35	0.843	16.1	1.5682	3.08	0.93	20.86			0.1312	1.65	1	予以口服溴隐停
1156754	女	49	视力下降、月经不调	2009.12.17	15	2年	80021039	09-37907	垂体瘤	PRL/TSH,侵及硬膜	PRL/TSH	未测	经蝶	2*5	软至韧		粘连		N	N	N	N	N	108	0.563	20.1	4.109	1.88	0.75	9.26	0.584	32.5	3.4341	1.16	0.69	N
1192842	男	38	高血压，肥胖，紫纹	2010.7.21	17	3年	80037762	10-22225	Cushing综合征，垂体微腺瘤	多激素腺瘤	GH，PRL，ACTH，LH，FSH灶性	未测	经蝶	0.5	软	一般	清	未诉	N	N	N	N	N	8.1	0.085	43.2	0.13	1.86	0.55	3.08	0.116	12.4	0.05	1.8	0.78	术前内分泌科：ACTH 24.7，皮质醇晨345.4，24小时尿游离皮质醇1664.4，大剂量地米试验阳性。
1193490	男	30	头痛，视力下降	2010.7.26	12	2年	80038095	10-22235	Rathke囊肿	Rathke囊肿伴多激素腺瘤	ACTH，GH	未测	经蝶	2*2*3	囊性	未诉	清	无	N	N	N	N	N	6.32	0.551	10.9	1.86	2.43	0.53	3.2	<0.05	<10	0.41	1.47	0.63
1194201	女	42	头痛，闭经，视物模糊	2010.7.29	60	15年	80038500	10-23147	垂体巨腺瘤	多激素腺瘤侵及硬膜	ACTH，TSH、PRL、GH散在	未测	经蝶	3*2	软至韧	未诉	不清	鞍上	N	Y	Y	Y	N	67.7	<0.05	38.9	5.17	2.09	0.7	23.1	0.079	15.5	0.36	1.88	0.77	拔出鼻腔砂条后CSF鼻漏，行腰穿置管11天未愈行经蝶修补术，术中置管，术后发热，脑膜炎，脑脊液培养阴性，经抗感染等治疗愈合可
1194662	男	26	乳房胀痛性功能下降	2010.8.1	13	2年	80037818	10-22541	垂体PRL腺瘤	多激素腺瘤累及硬膜	PRL，ACTH少许	未测	经蝶	1.5	稀软至韧	一般	不清	未诉	N	Y	N	N	鼻部出血	143	<0.05	50.2	1.34	2.68	0.77	21.5	0.075	<10	0.13	1.53	0.82
1195036	女	15	继发性闭经	2010.8.3	17	半年	80037820/80038551	10-23337	垂体瘤卒中	多激素腺瘤	PRL，ACTH，GH	未测	经蝶	1	韧	未诉	清	未诉	Y	Y	N	N	N	79.32	0.351	55	2.78	3.23	1.02	0.8	0.86	67.8	3.65	3.86	1.52
1195657	女	31	月经不调	2010.8.6	23	3年	80039156	10-24406	垂体腺瘤	多激素腺瘤侵及硬膜	GH，TSH，PRL+-	未测	经蝶	1.5	软至韧	未诉	未诉	鞍底硬膜	N	N	N	N	N	84.4	0.628	28.7	1.72	2.81	0.95	3.2	0.142	<10	0.19	2	0.88
1201370	女	13	月经不调	2010.9.9	13	半年	缺	10-27274	垂体PRL腺瘤药物治疗后	多激素腺瘤	GH，LH，PRL	未测	经蝶	0.6	脆韧	一般	清	未诉	N	N	N	N	N	54.8	0.19	27.7	3.38	2.63	1.11	16.1	6.9	12
1208863	男	27	乏力	2010.10.24	16	6年	80045901	10-32310	垂体TSH腺瘤，甲亢	TSH,PRL腺瘤	TSH，PRL	<5%	经蝶	1	坚硬	未诉	清	无	N	N	N	N	N	9.04	0.633	42.8	5.69	10.71	2.2	4.7	0.86	25.7	0.02	3.17	1.71
1212041	女	34	体重增加，血压高	2010.11.1	28	3月	80046858	10-33971	cushing综合征，垂体瘤伴Rathke囊肿	多激素细胞腺瘤	LH，PRL，GH，ACTH	未测	经蝶	0.5*0.6	韧	一般	未诉	未诉	N	N	N	N	N	3.06	0.173	H	Normal	L	L		0.226	96.5	0.16	1.84	1	术前内分泌：ACTH 43.85，皮质醇晨 378.7，午 282.5，为正常上限的2倍，术后心率快，血压高，神经精神症状，意识障碍，反应迟钝，不言语，发热，38.5-39.4，术后皮质醇午350.4，

## Sheet: 2019-2020数据
手术时间	检测结果	住院号	性别	年龄	内分泌症状	血清	PRL (ng/ml)	FSH (mIU/ml）	LH （mIU/ml）	GH (ng/ml)	TSH (uIU/ml)	ACTH （pg/ml)	大小 cm	侵袭	全切	病理	Ki67 ％	SOX-2
20190814	20190820	1006526156	女	38	头晕	TSH 5.34 ACTH 23.5	<0.25	<0.2	<0.2	<0.05	5.29	4	4	是	是	TSH（＋），ACTH（灶＋），PRL（部分＋）	3	1％＋
20190910	20190919	1009546636	女	47	GH 肢端肥大	GH 61 IGF-1 1024	0.36	<0.2	<0.2	94	<0.0025	＜1	3	否	否	GH部分（＋），PRL（个别＋），LH（＋）	2	－
20191021	20191025	2501720842	女	57	TSH 胸闷心慌	TSH 7.28	<0.25	<0.2	<0.2	<0.05	0.036	＜1	2	是	否	PRL(＋),TSH(部分＋)	2	部分＋
20191111	20191114	1009728175	女	68	视力下降	无功能	0.67	<0.2	<0.2	0.15	<0.0025	＜1	4	是	否	GH(个别＋),PRL(个别＋),LH(局部＋)	3	－
2020.07.30	20200805	60010096162	男	32	GH 肢端肥大	PRL 46.44	>200	<0.2	<0.2	146	20.9	＜1	1.5	是	否	PRL(大部分＋），GH(部分＋），TSH（散在+）	3	－
2020.08.26	2020.09.01	1009049993	男	26	GH 肢端肥大	GH 164 IGF-1 645	49.86	<0.2	<0.2	139	0.055	＜1	2.5	是	否	GH(＋），PRL(部分＋），TSH（部分＋）	3	－
2020.08.31	20200903	1009909153	女	55	ACTH 库欣病	ACTH 10.43	<0.25	<0.2	<0.2	<0.05	<0.0025	2000	3	是	是	ACTH(+),PRL(+)	1	－
2020.09.17	20200921	60010136049	男	54	GH 肢端肥大	GH 3.21 IGF-1 690	1.92	<0.3	<0.3	84.32	23.6	3.7	3	是	是	GH(+),PRL(+),TSH（＋），ACTH(散在＋）	低	－
2020.09.21	20200924	1010293517	女	57	头痛	无功能	<0.25	11.66	<0.2	<0.05	<0.0025	96.7	1.5	是	是	ACTH(+),FSH（部分＋）	1	－
20201015	20201019	1010039233	女	30	PRL 月经紊乱	PRL 36.57	>200	>202	>254	134	>100	933.5	1	否	否	T-PIT(弱＋），PIT-1(＋），SF-1(＋） PRL(＋），GH（部分＋），LH(部分＋）	1	－
20201102	20201105	60010075858	男	34	GH 肢端肥大 多饮多尿	GH 17 IGF-1 694	64	0.29	<0.2	120	0.052	277.4	2	是	否	T-PIT(部分＋），PIT-1（＋），SF-1(＋）， ACTH(＋），FSH（少许＋），GH(＋），LH(＋）， PRL(＋），TSH(＋）	1	＋
2020.11.05	20201110	60010208220	女	30	PRL 月经紊乱	ACTH 39	>2000	<0.2	<0.2	<0.05	<0.0025	>2000	2	是	是	T-PIT(＋），PIT-1（部分＋），SF-1（＋）， ACTH(＋），PRL（部分＋）	8	＋

## Sheet: 数据2
性别	年龄	主诉		入院时间	住院时间（d）	病程		组化	ki-67	术式
											肿瘤大小（cm）
女	38	视野缺损		2008.9.22	45	13年	156	TSH，PRL	未测	经蝶	1*0.8*0.7
女	55	头痛，视力下降		2008.7.28	18	6年	72	ACTH，PRL	未测	经蝶	未诉
男	46	头痛，视力下降		2008.3.17	25	3年	36	PRL，FSH	未测	经蝶	3*3*2.5
女	63	视力下降		2008.3.7	17	2年	24	ACTH，PRL	未测	经蝶	2*2.5
男	22	头痛		2008.1.25	11	2年	24	PRL，ACTH	未测	经蝶	5*5*5.5
男	61	视力下降		2008.1.19	12	2年	24	ACTH，PRL	未测	经蝶	1.5*1.8*1.6
女	44	视力下降		2008.2.19	16	半年	6	PRL，LH，GH	未测	经蝶	1.8*2.7
女	53	视力下降		2008.2.26	13	3年	36	PRL，GH，FSH，LH	未测	经蝶	4*2*2.5
女	20	头痛视力下降		2008.2.27	21	10月	10	PRL，GH	未测	经蝶	2.5*2.5*1.5
女	41	肢端肥大		2008.2.28	22	7月	7	GH，PRL	未测	经蝶	0.5*0.5*0.5
男	59	视物模糊		2008.3.7	15	1月	1	LH，PRL	未测	经蝶	未诉
女	46	头痛/肢端肥大		2008.3.7	18	6年/2年	24	GH，PRL小灶性，TSH小灶性	未测	经蝶	1*1
男	45	肢端肥大		2008.3.11	13	4年	48	GH，PRL，ACTH灶性	未测	经蝶	1*1
女	24	产后视物模糊		2008.3.19	24	不详		PRL，TSH	未测	经蝶	未诉
男	57	视力下降		2008.4.1	15	4年	48	ACTH，PRL	未测	经蝶	2*2.5*3.5
男	54	视力下降		2008.3.26	13	3月	3	PRL，LH	未测	经蝶	3*2.5*3
女	36	闭经泌乳		2008.5.11	15	5年	60	ACTH，PRL	未测	经蝶	2.4*2.7*1.5
男	70	视力下降		2008.6.13	18	1月	1	LH，PRL	未测	经蝶	2.5*1.5*1.5
男	51	体检发现		2008.6.18	19	4天	0.25	PRL，LH	未测	经蝶	2
女	51	视力下降		2008.7.9	14	2年	24	PRL，ACTH灶性	未测	经蝶	3.5*2.5*2.5
女	32	泌乳		2008.9.8	10	6月	6	GH，PRL，ACTH、	未测	经蝶	1
女	23	闭经		2008.9.3	27	4月	4	PRL，GH，ACTH灶性	未测	经蝶	0.6*0.7
女	25	高血压，左肾上腺瘤		2008.11.17	32	4/2年	24	ACTH，PRL，GH	未测	经蝶	0.8*0.8*0.5
男	50	头痛		2008.11.18	17	1月	1	PRL，TSH	未测	经蝶	1.3*1.2*0.8
男	43	肢端肥大		2008.9.11	14	8年	96	GH，TSH	未测	经蝶	1.2*1*1
女	40	闭经泌乳		2008.10.13	21	2年	24	PRL，ACTH部分，LH部分，GH部分	未测	经蝶	0.4*0.3*0.3
男	64	发现鞍区占位		2008.12.4	22	10年	120	LH部分，FSH部分	未测	经蝶	3.1*2.6*2.2
女	60	视力下降		2009.5.10	17	10年	120	ACTH，GH，PRL	未测	开颅	4
男	44	视力下降		2009.7.12	23	5年	60	FSH，PRL	<5%	经蝶	2
女	20	肥胖，停经		2009.2.10	22	2年	24	PRL，LH，GH，TSH	未测	经蝶	未诉
女	24	月经不规则		2009.1.6	14	6年	72	ACTH，GH，PRL	未测	经蝶	1.5*1*1
男	38	视力下降		2009.4.21	28	3月	3	FSH，LH,GH，PRL	未测	经蝶	3*2.5*2.5
女	33	月经不调，泌乳		2009.2.17	28	10年	120	GH，ACTH	未测	经蝶	1.5*1.5*1
男	15	视力下降		2009.2.19	26	1周	0.25	GH，PRL，ACTH，LH	未测	经蝶	2*1.5*1
男	15	肥胖		2009.2.24	39	3月	3	PRL，GH，ACTH	未测	经蝶	1.2*1.2*1
女	56	头痛视物模糊		2009.3.18	26	5月	5	ACTH，GH	未测的	经蝶	0.8*0.5*0.5
女	59	头痛		2009.3.22	25	1周	0.25	PRL，LH，GH	未测	经蝶	1.5*1.5*2
女	36	视力下降		2009.3.30	10	1年	12	PRL，GH	<1%	经蝶	3.5*3*3
男	23	视力下降，性功能减退		2009.3.30	18	0.5年	6	PRL，GH	0.05	经蝶	4*3.5*3.5
男	41	视力下降伴视野缺损		2009.4.6	11	1年半	16	LH，GH，PRL	未做	经蝶	５×４×４
女	42	停经，视力下降		2009.4.14	18	3年	36	FSH，GH，PRL	<5%	经蝶	3*3*3.5
男	57	左侧面部麻木伴左眼视力下降		2009.4.16	23	2年	24	PRL，GH	未测	经蝶	3.5*3*3
男	53	肢端肥大		2009.6.11	20	8年	96	PRL，LH,GH	未测	经蝶	1.8*1.1
女	37	进行性肥胖		2009.6.12	21	2年	24	ACTH，PRL，GH	未测	经蝶	1.5
女	20	发热		2009.6.29	24	1月	1	ACTH，PRL，GH	未测	经蝶	1.5*1*0.5
女	33	月经不调		2009.6.29	16	半月	6	ACTH，PRL，GH	未测	经蝶	0.8*0.5*0.8
女	38	月经不调		2009.7.20	15	2月	2	ACTH，PRL	未测	经蝶	未诉
女	64	视力下降		09.10.18	17	3年	36	PRL，TSH，GH灶性	0.01	经蝶	1.4*0.8
男	39	头痛，肢端肥大		09.10.19	14	3年	36	PRL，LH，TSH	未测	经蝶	1.5*1.2
男	35	肢端肥大，头痛		09.10.26	16	1年	12	ACTH，PRL，GH	未测	经蝶	1.5*1*1
男	51	消瘦		09.10.28	20	3月	3	PRL，TSH	未测	经蝶	未诉
男	52	多饮多尿		2009.11.14	20	1月	1	ACTH，GH，PRL	未测	经蝶	0.7*1
女	33	月经不调泌乳		09.11.25	13	4年	48	LH，PRL，GH	未测	经蝶	未诉
女	49	视力下降、月经不调		2009.12.17	15	2年	24	PRL/TSH	未测	经蝶	2*5
男	38	高血压，肥胖，紫纹		2010.7.21	17	3年	36	GH，PRL，ACTH，LH，FSH灶性	未测	经蝶	0.5
男	30	头痛，视力下降		2010.7.26	12	2年	24	ACTH，GH	未测	经蝶	2*2*3
女	42	头痛，闭经，视物模糊		2010.7.29	60	15年	180	ACTH，TSH、PRL、GH散在	未测	经蝶	3*2
男	26	乳房胀痛性功能下降		2010.8.1	13	2年	24	PRL，ACTH少许	未测	经蝶	1.5
女	15	继发性闭经		2010.8.3	17	6月	6	PRL，ACTH，GH	未测	经蝶	1
女	31	月经不调		2010.8.6	23	3年	36	GH，TSH，PRL+-	未测	经蝶	1.5
女	13	月经不调		2010.9.9	13	6月	6	GH，LH，PRL	未测	经蝶	0.6
男	27	乏力		2010.10.24	16	6年	72	TSH，PRL	<5%	经蝶	1
女	34	体重增加，血压高		2010.11.1	28	3月	3	LH，PRL，GH，ACTH	未测	经蝶	0.5*0.6
女	47	GH 肢端肥大					33.1734	GH部分（＋），PRL（个别＋），LH（＋）		经蝶	3
女	38	头晕						TSH（＋），ACTH（灶＋），PRL（部分＋）		经蝶	4
女	57	TSH 胸闷心慌						PRL(＋),TSH(部分＋)		经蝶	2
女	68	视力下降						GH(个别＋),PRL(个别＋),LH(局部＋)		经蝶	4
男	32	GH 肢端肥大						PRL(大部分＋），GH(部分＋），TSH（散在+）		经蝶	1.5
男	26	GH 肢端肥大						GH(＋），PRL(部分＋），TSH（部分＋）		经蝶	2.5
女	55	ACTH 库欣病						ACTH(+),PRL(+)		经蝶	3
男	54	GH 肢端肥大						GH(+),PRL(+),TSH（＋），ACTH(散在＋）		经蝶	3
女	57	头痛						ACTH(+),FSH（部分＋）		经蝶	1.5
女	30	PRL 月经紊乱						T-PIT(弱＋），PIT-1(＋），SF-1(＋） PRL(＋），GH（部分＋），LH(部分＋）		经蝶	1
男	34	GH 肢端肥大 多饮多尿						T-PIT(部分＋），PIT-1（＋），SF-1(＋）， ACTH(＋），FSH（少许＋），GH(＋），LH(＋）， PRL(＋），TSH(＋）		经蝶	2
女	30	PRL 月经紊乱						T-PIT(＋），PIT-1（部分＋），SF-1（＋）， ACTH(＋），PRL（部分＋）		经蝶	2
							156
